# Supplementary material for: MIR retrotransposons link the epigenome and the transcriptome of coding genes in acute myeloid leukemia
Source: PubMed Central journal article supplement (PMC9622910; doi:10.1038/s41467-022-34211-x), 2022-10-31
Supplement: 41467_2022_34211_MOESM2_ESM.pdf [file 41467_2022_34211_MOESM2_ESM.pdf]

### **Description of Additional Supplementary Files**

File Name: Supplementary Data 1

Description: Topologically associated domains (TADs) in human CD34+ cells

File Name: Supplementary Data 2

Description: Correlations, differentially expressed genes & differentially methylated cytosines

File Name: Supplementary Data 3

Description: Pathway analyses in correlations or differentially expressed genes

File Name: Supplementary Data 4

Description: Gene architecture biases

File Name: Supplementary Data 5

Description: Enrichment/Depletion of histone marks and Transcription Factors.

File Name: Supplementary Data 6

Description: Integrative analysis of leukemic samples and normal cells.
